# Supplementary material
Source: PubMed Central journal article supplement (PMC7308605)
Supplement: 12648_2020_1766_MOESM1_ESM.pdf [file 12648_2020_1766_MOESM1_ESM.pdf]

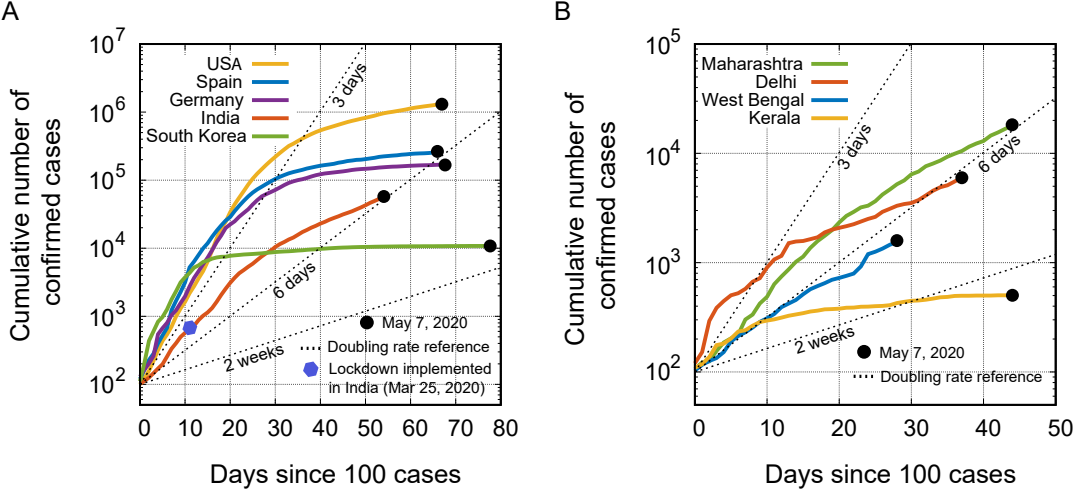

FIG. S1. Time progression of the cumulative number of confirmed COVID-19 positive cases from the days since 100 cases for (A) different countries (B) different Indian states, plotted on a semi-log scale.

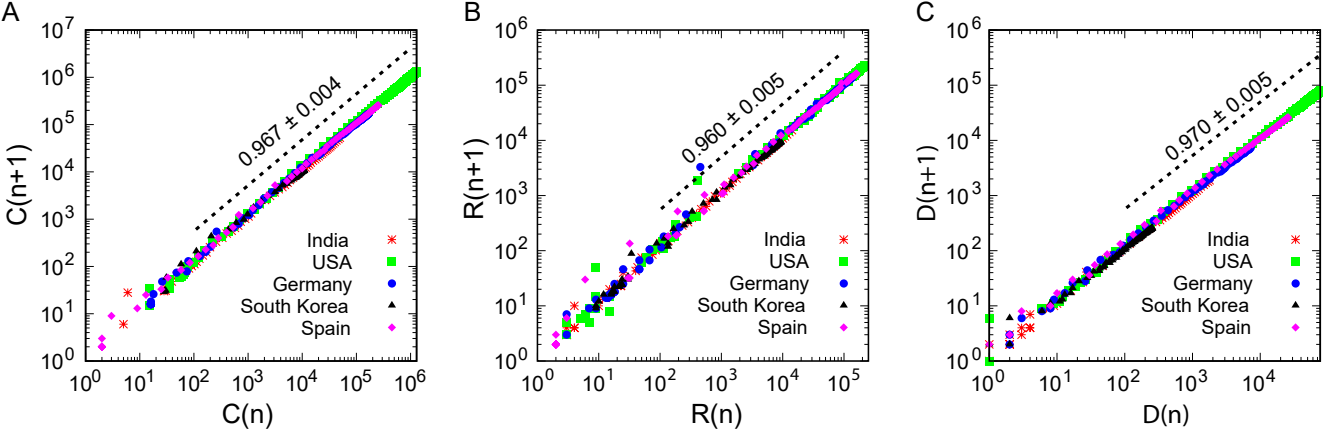

FIG. S2. The recurrence correlation between the population on day  $n$  and day  $n + 1$  plotted on a log-log scale. (A)  $C(n)$  stands for the number of cumulative confirmed infective cases on day  $n$ . (B)  $R(n)$  stands for total recovered population on day  $n$ . (C)  $D(n)$  stands for total deaths on day  $n$ . The population count on  $n^{th}$  day vs population count on  $(n + 1)^{th}$  day plots for several countries, exhibit same power law of the following kind:  $f(x) = ax^b$ .



| Abbreviation | Meaning                                                                                   | Value                        |
|--------------|-------------------------------------------------------------------------------------------|------------------------------|
|              | <b>Parameters for India</b>                                                               |                              |
| $\beta$      | rate of infection                                                                         | $0.2945 \text{ day}^{-1}$    |
| $\gamma$     | rate of recovery                                                                          | $0.073 \text{ day}^{-1}$     |
| $\delta$     | rate of death                                                                             | $0.0028 \text{ day}^{-1}$    |
| $\zeta$      | infection/interaction parameter                                                           | 0.435                        |
| $\tau$       | The day from which<br>the containment measures<br>are implemented<br>counted from day 0   | 30 days                      |
| $T$          | delay in number of days before<br>the effect of containment<br>measures becomes prominent | 9 days                       |
| $S_0$        | initial susceptible population                                                            | $1.0\text{-}3.0 \times 10^6$ |

TABLE S1. List of parameters chosen for the best fit with real data in Indian context.

| Abbreviation                                             | Meaning                                                                                   | Value                     |
|----------------------------------------------------------|-------------------------------------------------------------------------------------------|---------------------------|
| Parameters for<br>Indian state <b>Kerala</b>             |                                                                                           |                           |
| $\beta$                                                  | rate of infection                                                                         | $0.26 \text{ day}^{-1}$   |
| $\gamma$                                                 | rate of recovery                                                                          | $0.092 \text{ day}^{-1}$  |
| $\delta$                                                 | rate of death                                                                             | $0.004 \text{ day}^{-1}$  |
| $\zeta$                                                  | infection/interaction parameter                                                           | 0.18                      |
| $\tau$                                                   | The day from which<br>the containment measures<br>are implemented<br>counted from day 0   | 22 days                   |
| $T$                                                      | delay in number of days before<br>the effect of containment<br>measures becomes prominent | 4 days                    |
| $S_0$                                                    | initial susceptible population                                                            | $10^4$                    |
| Parameters for<br>Indian state <b>Maharashtra</b>        |                                                                                           |                           |
| $\beta$                                                  | rate of infection                                                                         | $0.27 \text{ day}^{-1}$   |
| $\gamma$                                                 | rate of recovery                                                                          | $0.0576 \text{ day}^{-1}$ |
| $\delta$                                                 | rate of death                                                                             | $0.0038 \text{ day}^{-1}$ |
| $\zeta$                                                  | infection/interaction parameter                                                           | 0.55                      |
| $\tau$                                                   | The day from which<br>the containment measures<br>are implemented<br>counted from day 0   | 20 days                   |
| $T$                                                      | delay in number of days before<br>the effect of containment<br>measures becomes prominent | 15 days                   |
| $S_0$                                                    | initial susceptible population                                                            | $0.8-1.6 \times 10^5$     |
| Parameters for<br>Indian state <b>West Bengal</b>        |                                                                                           |                           |
| $\beta$                                                  | rate of infection                                                                         | $0.314 \text{ day}^{-1}$  |
| $\gamma$                                                 | rate of recovery                                                                          | $0.086 \text{ day}^{-1}$  |
| $\delta$                                                 | rate of death                                                                             | $0.008 \text{ day}^{-1}$  |
| $\zeta$                                                  | infection/interaction parameter                                                           | 0.452                     |
| $\tau$                                                   | The day from which<br>the containment measures<br>are implemented<br>counted from day 0   | 14 days                   |
| $T$                                                      | delay in number of days before<br>the effect of containment<br>measures becomes prominent | 13 days                   |
| $S_0$                                                    | initial susceptible population                                                            | $0.8-1.6 \times 10^5$     |
| Parameters for<br>India's capital territory <b>Delhi</b> |                                                                                           |                           |
| $\beta$                                                  | rate of infection                                                                         | $0.24 \text{ day}^{-1}$   |
| $\gamma$                                                 | rate of recovery                                                                          | $0.06 \text{ day}^{-1}$   |
| $\delta$                                                 | rate of death                                                                             | $0.004 \text{ day}^{-1}$  |
| $\zeta$                                                  | infection/interaction parameter                                                           | 0.54                      |
| $\tau$                                                   | The day from which<br>the containment measures<br>are implemented<br>counted from day 0   | 24 days                   |
| $T$                                                      | delay in number of days before<br>the effect of containment<br>measures becomes prominent | 13 days                   |
| $S_0$                                                    | initial susceptible population                                                            | $0.8-1.6 \times 10^5$     |

TABLE S2. List of parameters chosen for the best fit with real data in Indian states Kerala, Maharashtra, West Bengal and Indian capital territory Delhi.

| Abbreviation                      | Meaning                                                                             | Value                        |
|-----------------------------------|-------------------------------------------------------------------------------------|------------------------------|
| <b>Parameters for Germany</b>     |                                                                                     |                              |
| $\beta$                           | rate of infection                                                                   | $0.305 \text{ day}^{-1}$     |
| $\gamma$                          | rate of recovery                                                                    | $0.1 \text{ day}^{-1}$       |
| $\delta$                          | rate of death                                                                       | $0.0030 \text{ day}^{-1}$    |
| $\zeta$                           | infection/interaction parameter                                                     | 0.24                         |
| $\tau$                            | The day from which the containment measures are implemented counted from day 0      | 39 days                      |
| $T$                               | delay in number of days before the effect of containment measures becomes prominent | 8 days                       |
| $S_0$                             | initial susceptible population                                                      | $10^6$                       |
| <b>Parameters for South Korea</b> |                                                                                     |                              |
| $\beta$                           | rate of infection                                                                   | $0.45 \text{ day}^{-1}$      |
| $\gamma$                          | rate of recovery                                                                    | $0.1 \text{ day}^{-1}$       |
| $\delta$                          | rate of death                                                                       | $0.001 \text{ day}^{-1}$     |
| $\zeta$                           | infection/interaction parameter                                                     | 0.1875                       |
| $\tau$                            | The day from which the containment measures are implemented counted from day 0      | 12 days                      |
| $T$                               | delay in number of days before the effect of containment measures becomes prominent | 7 days                       |
| $S_0$                             | initial susceptible population                                                      | $10^5$                       |
| <b>Parameters for USA</b>         |                                                                                     |                              |
| $\beta$                           | rate of infection                                                                   | $0.3085 \text{ day}^{-1}$    |
| $\gamma$                          | rate of recovery                                                                    | $0.08865 \text{ day}^{-1}$   |
| $\delta$                          | rate of death                                                                       | $0.003 \text{ day}^{-1}$     |
| $\zeta$                           | infection/interaction parameter                                                     | 0.42                         |
| $\tau$                            | The day from which the containment measures are implemented counted from day 0      | 35 days                      |
| $T$                               | delay in number of days before the effect of containment measures becomes prominent | 15 days                      |
| $S_0$                             | initial susceptible population                                                      | $1.0\text{-}1.6 \times 10^7$ |
| <b>Parameters for Spain</b>       |                                                                                     |                              |
| $\beta$                           | rate of infection                                                                   | $0.467 \text{ day}^{-1}$     |
| $\gamma$                          | rate of recovery                                                                    | $0.096 \text{ day}^{-1}$     |
| $\delta$                          | rate of death                                                                       | $0.007 \text{ day}^{-1}$     |
| $\zeta$                           | infection/interaction parameter                                                     | 0.262                        |
| $\tau$                            | The day from which the containment measures are implemented counted from day 0      | 22 days                      |
| $T$                               | delay in number of days before the effect of containment measures becomes prominent | 11 days                      |
| $S_0$                             | initial susceptible population                                                      | $10^6$                       |

TABLE S3. List of parameters chosen for countries Germany, South Korea, USA and Spain.
